# Supplementary material for: Comprehensive genomic survey, structural&nbsp;classification and expression analysis of C2H2-type&nbsp;zinc finger factor&nbsp;in wheat (Triticum aestivum&nbsp;L.)
Source: Research Square preprint supplement (doi:10.21203/rs.3.rs-215409/v1), 2021-02-11
Supplement: Supplementary file 1 [file 0926cefc1155dc41ef92020c.xlsx]

## Sheet: T.aestivum and T.aestivum
Additional file 1 of Comprehensive genomic survey, structural classification and expression analysis of C2H2-type zinc finger factor in wheat (Triticum aestivum L.) Yongliang Li, Aolong Sun, Qun Wu, Xiaoxiao Zou, Fenglin Chen, Ruqiong Cai, Hai Xie, Meng Zhang, Xinhong Guo
Supplementary Table S3: One-to-one orthologous relationships between T.aestivum and T.aestivum
TaC2H2-ZF Gene ID	TaC2H2-ZF Gene ID	Ka	Ks	Ka/Ks	EffectiveLen	AverageS-sites	AverageN-sites	Selection pressure	Mya
Traes_7AS_B60BC1735.1	Traes_7BS_64FF2F5E2.4	0.673107	4.5708	0.147262	856	245.137	610.863	Purifying selection	351.6
Traes_2AS_9D9D66343.1	Traes_2BS_C270C0C9F.1	0.770576	2.61281	0.294923	1189	298.13	890.87	Purifying selection	200.985
Traes_6AL_1A07854E2.1	Traes_4AL_954AE4933.1	0.999698	3.92147	0.25493	1241	289.123	951.877	Purifying selection	301.652
Traes_4AL_954AE4933.1	Traes_6DL_244C908B5.1	1.05112	3.8045	0.276283	1527	381.81	1145.19	Purifying selection	292.654

## Sheet: T.aestivum and A.tauschii
Additional file 1 of Comprehensive genomic survey, structural classification and expression analysis of C2H2-type zinc finger factor in wheat (Triticum aestivum L.) Yongliang Li, Aolong Sun, Qun Wu, Xiaoxiao Zou, Fenglin Chen, Ruqiong Cai, Hai Xie, Meng Zhang, Xinhong Guo
Supplementary Table 3: One-to-one orthologous relationships between T.aestivum and A.tauschii
TaC2H2-ZF Gene ID	AETC2H2-ZF Gene ID	Ka	Ks	Ka/Ks	EffectiveLen	AverageS-sites	AverageN-sites	Selection pressure	Mya
Traes_1AS_21ACC7F67.1	AET1Gv20041200.1	0.336247	0.645172	0.521174	1167	345.45	821.55	Purifying selection	49.6286
Traes_1AS_8B624F2DA.15	AET1Gv20135200.1	0.316044	0.602505	0.52455	171	41.75	129.25	Purifying selection	46.3465
Traes_1BS_0DEFAACB9.1	AET1Gv20041200.1	0.107449	0.696152	0.154347	165	30.0833	134.917	Purifying selection	53.5501
Traes_1BS_CF75D4172.1	AET1Gv20135200.1	0.481127	0.745956	0.64498	171	42.25	128.75	Purifying selection	57.3812
Traes_1DS_0BBC3B5D3.1	AET1Gv20041200.1	0.149911	0.686717	0.218301	165	30.25	134.75	Purifying selection	52.8244
Traes_1DS_F40AC713C.1	AET1Gv20135200.1	0.153213	0.476644	0.321442	734	197.52	536.48	Purifying selection	36.6649
Traes_2AL_7ABA7B7C8.1	AET2Gv20895700.1	0.269209	0.568777	0.473311	1908	456.417	1451.58	Purifying selection	43.7521
Traes_2DL_540050272.1	AET2Gv20895700.1	0.00359368	0.0662892	0.0542122	1836	441.333	1394.67	Purifying selection	5.09917
Traes_2BS_705DDDDC8.1	AET2Gv20002500.1	0.0420484	0.109861	0.38274	1059	288.667	770.333	Purifying selection	8.45088
Traes_2BL_58A855C7B.1	AET2Gv20895700.1	0.0757867	0.512103	0.147991	1839	442	1397	Purifying selection	39.3926
Traes_3AL_00FAACD5D.1	AET3Gv20850900.1	0.0151043	0.130663	0.115598	1554	350.25	1203.75	Purifying selection	10.051
Traes_3B_BD1C1A168.1	AET3Gv20381700.1	0.0191456	0.115116	0.166316	1467	356.083	1110.92	Purifying selection	8.85507
Traes_3AS_BE15533CD.1	AET3Gv20230700.1	0.0200644	0.0780384	0.257109	603	148.417	454.583	Purifying selection	6.00296
Traes_3AL_35CA14632.1	AET3Gv20509600.1	0.0106794	0.0371234	0.287673	1269	294.5	974.5	Purifying selection	2.85564
TRAES3BF182900010CFD_t1	AET3Gv20230700.1	0.017858	0.134019	0.13325	600	146.667	453.333	Purifying selection	10.3091
TRAES3BF127400030CFD_t1	AET3Gv20802200.1	0.0185912	0.0775338	0.239782	585	149.333	435.667	Purifying selection	5.96414
TRAES3BF099700020CFD_t1	AET3Gv20831600.1	0.0288074	0.0797336	0.361295	822	185.083	636.917	Purifying selection	6.13336
Traes_3B_4F42DE6C4.1	AET3Gv20850900.1	0.0108335	0.103613	0.104558	1560	351.333	1208.67	Purifying selection	7.97021
TRAES3BF064300010CFD_t1	AET3Gv20381700.1	0.0164028	0.0952953	0.172126	1467	357.583	1109.42	Purifying selection	7.33041
TRAES3BF042100060CFD_t1	AET3Gv20509600.1	0.012836	0.0371989	0.345064	1263	293.917	969.083	Purifying selection	2.86145
TRAES3BF044200110CFD_t1	AET3Gv20850900.1	0.345635	0.709938	0.486852	1560	351.5	1208.5	Purifying selection	54.6106
Traes_3DS_9A5A4FE3E.1	AET3Gv20121500.1	0.00481285	0.0166983	0.288224	807	181.667	625.333	Purifying selection	1.28448
Traes_3AS_88AAED4BB.1	AET3Gv20230700.1	0.00219942	0.0136678	0.160919	603	147.667	455.333	Purifying selection	1.05137
Traes_3B_72EA1BDB5.2	AET3Gv20509600.1	0.125508	0.324534	0.386733	1275	295	980	Purifying selection	24.9642
Traes_4AS_501676A91.1	AET4Gv20648700.1	0.0230853	0.163896	0.140853	801	207.167	593.833	Purifying selection	12.6074
Traes_4AS_2718699A7.1	AET4Gv20583500.1	0.0122429	0.0619867	0.197508	1242	336.167	905.833	Purifying selection	4.76821
Traes_4AS_F7A905B43.1	AET4Gv20715000.1	0.00308088	0.107006	0.0287916	831	180.5	650.5	Purifying selection	8.23124
Traes_4BL_DB9678C4C.1	AET4Gv20583500.1	0.0125669	0.0562178	0.22354	1215	332.333	882.667	Purifying selection	4.32444
Traes_4DL_DF1F43E16.1	AET4Gv20715000.1	0.00153965	0.0224526	0.0685733	831	180.833	650.167	Purifying selection	1.72712
Traes_4AL_FC7AEBB05.1	AET5Gv21155000.1	0.0606372	0.135542	0.447368	1233	291.667	941.333	Purifying selection	10.4263
Traes_5BL_388501B7C.1	AET5Gv21106300.1	0.0937615	0.383119	0.244732	399	98.3333	300.667	Purifying selection	29.4707
Traes_5AL_78701B16C.1	AET5Gv20618300.1	0.0238401	0.121423	0.196339	1224	307.75	916.25	Purifying selection	9.34026
Traes_5BL_096B0BDA8.1	AET5Gv20828100.1	0.0164661	0.0961522	0.17125	1638	410	1228	Purifying selection	7.39633
Traes_5BL_7F56360BF.1	AET5Gv20927300.1	0.0138094	0.131966	0.104643	783	198.333	584.667	Purifying selection	10.1513
Traes_5BL_B038BE0A3.1	AET5Gv21106300.1	0.0899756	0.36676	0.245326	399	98.25	300.75	Purifying selection	28.2123
Traes_5BL_630A8A142.1	AET5Gv21106800.1	0.0752403	0.313231	0.240207	501	130.833	370.167	Purifying selection	24.0947
Traes_5BL_BA26BA910.1	AET5Gv21155000.1	0.0455632	0.0955837	0.476683	1221	286	935	Purifying selection	7.35259
Traes_5BL_13B5BB344.1	AET5Gv20560500.1	0.0309322	0.0995435	0.310741	1377	354	1023	Purifying selection	7.65719
Traes_5BL_6888AE9CB.1	AET5Gv20618300.1	0.019909	0.0859554	0.23162	1224	307.833	916.167	Purifying selection	6.61196
Traes_1AS_CD57D000A.1	AET5Gv20210400.1	0.0202679	0.0178899	1.13292	1233	282.833	950.167	Purifying selection	1.37615
Traes_5DL_51643AC9F.1	AET5Gv20618300.1	0.29775	0.326522	0.911881	1230	311	919	Purifying selection	25.1171
Traes_5DL_13706ACAF.1	AET5Gv20828100.1	0.155629	0.452367	0.344033	1641	410.5	1230.5	Purifying selection	34.7975
Traes_5DL_6CBF61AA4.1	AET5Gv20927300.1	0.154231	0.621328	0.248227	999	257.833	741.167	Purifying selection	47.7944
Traes_5DL_F8AEA5040.1	AET5Gv20437000.1	0.0731062	0.0877623	0.833001	606	135.833	470.167	Purifying selection	6.75095
Traes_5DS_818C09355.1	AET5Gv20210400.1	0.296745	0.857894	0.345899	1233	282.333	950.667	Purifying selection	65.9918
Traes_5BL_BB99746DD.1	AET5Gv21105500.1	0.16211	0.371093	0.436844	498	129.5	368.5	Purifying selection	28.5456
Traes_5DL_AA1443700.1	AET5Gv21106300.1	0.0865666	0.394957	0.21918	399	99.3333	299.667	Purifying selection	30.3813
Traes_5DL_F269EF70D.1	AET5Gv21106300.1	0.0334262	0.138957	0.240551	399	99.1667	299.833	Purifying selection	10.689
Traes_5DL_4E890ABF3.1	AET5Gv21106800.1	0.0732467	0.338703	0.216257	483	124.75	358.25	Purifying selection	26.054
Traes_5DL_3FF4E75CD.1	AET5Gv21106800.1	0.00788444	0.00752829	1.04731	516	133.5	382.5	Purifying selection	0.5791
Traes_6AS_C15119294.1	AET6Gv20332200.1	0.0161123	0.122304	0.13174	420	106.333	313.667	Purifying selection	9.40802
Traes_6AL_779D5240A.1	AET6Gv20645100.1	0.0137155	0.0666628	0.205744	942	243	699	Purifying selection	5.1279
Traes_6AL_1A07854E2.1	AET6Gv20657000.1	0.00610729	0.0417371	0.146328	1734	418.75	1315.25	Purifying selection	3.21055
Traes_6AL_BA6465E82.1	AET6Gv20523400.1	0.35853	0.591049	0.6066	498	113.5	384.5	Purifying selection	45.4653
Traes_4AL_954AE4933.1	AET6Gv20657000.1	0.00305772	0.0293316	0.104246	1728	417.167	1310.83	Purifying selection	2.25628
Traes_6BL_CC009B78A.1	AET6Gv20523400.1	0.352697	0.509838	0.691782	498	111.5	386.5	Purifying selection	39.2183
Traes_6DS_DE865EA6D.1	AET6Gv20332200.1	0.031966	0.0657931	0.485856	420	106.5	313.5	Purifying selection	5.061
Traes_6DL_9FC9C02351.1	AET6Gv20645100.1	0.154321	0.617828	0.249779	945	242.833	702.167	Purifying selection	47.5252
Traes_6DL_244C908B5.1	AET6Gv20657000.1	0.0859011	0.466785	0.184027	1734	419.5	1314.5	Purifying selection	35.9066
Traes_6DL_3B9E63F04.2	AET6Gv20507100.1	0.347727	0.476557	0.729666	1107	281.333	825.667	Purifying selection	36.6582
Traes_6DL_F47CFC6D9.1	AET6Gv20523400.1	0.371326	0.534492	0.694726	498	113.583	384.417	Purifying selection	41.1148
Traes_7AL_1070DBD71.1	AET7Gv20982400.1	0.00206328	0.117025	0.017631	633	147.667	485.333	Purifying selection	9.00194
Traes_7BL_83946C3EC.1	AET7Gv20982400.1	0.170075	0.453475	0.375049	636	148.167	487.833	Purifying selection	34.8827
Traes_7AS_8054DC45D.1	AET7Gv20600000.1	0.00315624	0.0963891	0.0327447	417	99.5	317.5	Purifying selection	7.41455
Traes_7DS_5084227F2.1	AET7Gv20554600.1	0.0945831	0.126855	0.745598	1344	307.75	1036.25	Purifying selection	9.7581
Traes_7AS_9671D35EF.1	AET7Gv20600000.1	0.0175524	0.122545	0.143233	417	99.1667	317.833	Purifying selection	9.42651

## Sheet: T.aestivum and B.distachyon
Additional file 1 of Comprehensive genomic survey, structural classification and expression analysis of C2H2-type zinc finger factor in wheat (Triticum aestivum L.) Yongliang Li, Aolong Sun, Qun Wu, Xiaoxiao Zou, Fenglin Chen, Ruqiong Cai, Hai Xie, Meng Zhang, Xinhong Guo
Supplementary Table 3: One-to-one orthologous relationships between T.aestivum and B.distachyon
TaC2H2-ZF Gene ID	BdC2H2-ZF Gene ID	Ka	Ks	Ka/Ks	EffectiveLen	AverageS-sites	AverageN-sites	Selection pressure	Mya
Traes_2AS_FA70DB417.1	KQK15405	0.277746	0.437402	0.63499	1164	290.167	873.833	Purifying selection	33.6463
Traes_2AS_EC0A70BB3.1	KQK15459	0.173444	0.356289	0.486806	642	175.417	466.583	Purifying selection	27.4068
Traes_2BS_13A816248.1	KQK15525	0.126588	0.41114	0.307896	2316	566.083	1749.92	Purifying selection	31.6262
Traes_2BS_ACA52BC08.1	KQK15405	0.279175	0.420832	0.663388	1164	288.5	875.5	Purifying selection	32.3717
Traes_2BS_DD07C2EE6.1	KQK15459	0.181143	0.396175	0.457231	642	174.917	467.083	Purifying selection	30.475
Traes_2BS_C270C0C9F.1	KQK15525	0.136262	0.410556	0.331895	2307	561.417	1745.58	Purifying selection	31.5812
Traes_2AS_5A6E08D4E.1	KQK15405	0.278727	0.437067	0.637721	1170	290.833	879.167	Purifying selection	33.6206
Traes_2DS_AA0577470.1	KQK15459	0.148314	0.39012	0.380177	636	173.417	462.583	Purifying selection	30.0092
Traes_4AS_501676A91.1	KQK23107	0.0662279	0.370209	0.178893	1428	360.5	1067.5	Purifying selection	28.4776
Traes_4AL_FC7AEBB05.1	KQK12241	0.351712	0.564241	0.623336	1149	279.917	869.083	Purifying selection	43.4032
Traes_4AS_2718699A7.1	KQK22673	0.125508	0.365306	0.343569	1215	325.917	889.083	Purifying selection	28.1005
Traes_4BL_DB9678C4C.1	KQK22673	0.136553	0.361598	0.377638	1185	321.25	863.75	Purifying selection	27.8152
Traes_4BS_FE945D2FC.1	KQK14209	0.172834	0.336765	0.513218	630	160.333	469.667	Purifying selection	25.905
Traes_4DS_676CACEAC.1	KQK14209	0.166748	0.352343	0.473256	618	156.5	461.5	Purifying selection	27.1033
Traes_5BL_7F56360BF.1	KQK13044	0.122375	0.455966	0.268386	759	193.667	565.333	Purifying selection	35.0743
Traes_5BL_BA26BA910.1	KQK12241	0.369554	0.60786	0.607959	1146	277.5	868.5	Purifying selection	46.7585
Traes_5BL_63AE36D3A.1	KQK12444	0.24583	0.597001	0.411775	522	131.583	390.417	Purifying selection	45.9231
Traes_5DL_6CBF61AA4.1	KQK13044	0.125089	0.396497	0.315486	759	194.833	564.167	Positive selection	30.4998
Traes_5DL_4E890ABF3.1	KQK12444	0.229784	0.467833	0.491167	483	122.583	360.417	Purifying selection	35.9871
Traes_7AS_B60BC1735.1	KQK18507	0.33373	0.893956	0.373318	1287	289.917	997.083	Positive selection	68.7658
Traes_7AL_1070DBD71.1	KQK17682	0.109621	0.494423	0.221715	1065	255.25	809.75	Positive selection	38.0326
Traes_7BS_64FF2F5E2.4	KQK18507	0.29775	0.78771	0.377994	1281	286.083	994.917	Purifying selection	60.5931
Traes_7BL_83946C3EC.1	KQK17682	0.0882879	0.411415	0.214596	1038	246.583	791.417	Purifying selection	31.6473
Traes_7DS_5084227F2.1	KQK18507	0.295845	0.883774	0.334752	1281	287	994	Purifying selection	67.9826
Traes_1AS_21ACC7F67.1	KQK08112	0.091705	0.40932	0.224042	1146	257.833	888.167	Positive selection	31.4862
Traes_1AS_8B624F2DA.15	KQK07814	0.162639	0.616285	0.263903	945	200.083	744.917	Purifying selection	47.4065
Traes_1BS_0DEFAACB9.1	KQK08112	0.0871495	0.40518	0.215089	1146	258.75	887.25	Purifying selection	31.1677
Traes_1DS_0BBC3B5D3.1	KQK08112	0.0921752	0.419651	0.219647	1146	258.25	887.75	Positive selection	32.2809
Traes_1DS_F40AC713C.1	KQK07814	0.165021	0.601728	0.274245	945	199.583	745.417	Purifying selection	46.2867
Traes_3AL_00FAACD5D.1	KQK10809	0.065754	0.487022	0.135012	1554	349.417	1204.58	Purifying selection	37.4632
Traes_3AS_BE15533CD.1	KQK03154	0.168196	0.552884	0.304215	1326	312.75	1013.25	Purifying selection	42.5296
Traes_3B_BD1C1A168.1	KQK03537	0.154278	0.465959	0.331098	1359	329.917	1029.08	Purifying selection	35.843
Traes_3AL_35CA14632.1	KQK08378	0.123626	0.374536	0.330079	1371	313.75	1057.25	Purifying selection	28.8105
TRAES3BF114300150CFD_t1	PNT73352	0.374046	0.538636	0.694431	1248	316.833	931.167	Purifying selection	41.4336
TRAES3BF127400030CFD_t1	KQK10499	0.16381	0.351093	0.466571	543	135.833	407.167	Purifying selection	27.0072
TRAES3BF099700020CFD_t1	KQK10684	0.14144	0.440244	0.321278	1068	251.5	816.5	Purifying selection	33.8649
Traes_3B_4F42DE6C4.1	KQK10809	0.065625	0.457281	0.143511	1560	350.5	1209.5	Purifying selection	35.1755
TRAES3BF182900010CFD_t1	KQK03154	0.181702	0.599898	0.302888	1341	316.417	1024.58	Purifying selection	46.146
TRAES3BF231500020CFD_t1	KQK11405	0.207937	0.437041	0.475784	1437	354.5	1082.5	Purifying selection	33.6186
TRAES3BF064300010CFD_t1	KQK03537	0.128032	0.453003	0.28263	1335	323.25	1011.75	Purifying selection	34.8464
TRAES3BF099700020CFD_t1	KQK06003	0.347191	0.761882	0.455702	1029	239.5	789.5	Purifying selection	58.6063
TRAES3BF044200110CFD_t1	KQK10809	0.0671402	0.422808	0.158796	1560	350.667	1209.33	Purifying selection	32.5237
Traes_3B_850142A99.1	KQK11405	0.229897	0.460221	0.499536	1440	355.417	1084.58	Purifying selection	35.4016
Traes_3B_72EA1BDB5.2	KQK08378	0.115072	0.367611	0.313028	1365	312	1053	Purifying selection	28.2778
Traes_3AS_88AAED4BB.1	KQK03154	0.201155	0.58473	0.344013	1356	321.167	1034.83	Purifying selection	44.9792
Traes_1AL_7A2072713.1	PNT67548	0.273453	0.950384	0.287729	690	180.5	509.5	Purifying selection	73.1065
Traes_6AL_779D5240A.1	PNT69179	0.0913527	0.249626	0.365958	918	237.833	680.167	Purifying selection	19.202
Traes_6AL_1A07854E2.1	KQK00679	0.0901897	0.409324	0.220338	1686	402.333	1283.67	Purifying selection	31.4865
Traes_6DL_9FC9C02351.1	PNT69179	0.0953415	0.265999	0.358429	918	236.667	681.333	Purifying selection	20.4614
Traes_6DL_3B9E63F04.2	KQJ99994	0.0757843	0.376575	0.201246	1104	283.167	820.833	Purifying selection	28.9673
Traes_7AS_8054DC45D.1	KQJ98896	0.135564	0.525549	0.257948	1221	297.75	923.25	Purifying selection	40.4269
Traes_7AS_9671D35EF.1	KQJ98896	0.125228	0.583229	0.214716	1212	297.25	914.75	Purifying selection	44.8638
Traes_5AL_78701B16C.1	KQJ90731	0.114037	0.405442	0.281265	1116	284.167	831.833	Purifying selection	31.1879
Traes_5BL_6888AE9CB.1	KQJ90731	0.108257	0.429511	0.252046	1107	280.333	826.667	Purifying selection	33.0393
Traes_5BL_096B0BDA8.1	KQJ91416	0.128212	0.470418	0.272548	1527	375.833	1151.17	Purifying selection	36.186
Traes_5BS_AA1369440.1	PNT62440	0.305955	0.440513	0.694544	591	152.833	438.167	Purifying selection	33.8856
Traes_5BL_46BDE583B.1	KQJ89791	0.165796	0.483976	0.34257	900	217.083	682.917	Purifying selection	37.229
Traes_5DL_51643AC9F.1	KQJ90731	0.117335	0.415919	0.282109	1110	282.167	827.833	Purifying selection	31.9938
Traes_5DL_13706ACAF.1	KQJ91416	0.131302	0.46847	0.280277	1530	376	1154	Purifying selection	36.0362
Traes_5DL_F8AEA5040.1	KQJ89685	0.116536	0.457973	0.254461	906	209.583	696.417	Purifying selection	35.2287
Traes_5DL_98FA0887C.1	KQJ89791	0.160764	0.450247	0.357057	984	235.333	748.667	Purifying selection	34.6344
Traes_2AL_7ABA7B7C8.1	KQJ84076	0.0950019	0.466288	0.203741	1713	403.667	1309.33	Purifying selection	35.8683
Traes_2BL_0A51FACEC1.1	KQJ83955	0.121096	0.362627	0.333942	909	235.333	673.667	Purifying selection	27.8944
Traes_2DL_540050272.1	KQJ84076	0.095567	0.482103	0.198229	1713	403.5	1309.5	Purifying selection	37.0849
Traes_2BL_58A855C7B.1	KQJ84076	0.0945301	0.464782	0.203386	1713	403.167	1309.83	Purifying selection	35.7524

## Sheet: T.aestivum  and Rice
Additional file 1 of Comprehensive genomic survey, structural classification and expression analysis of C2H2-type zinc finger factor in wheat (Triticum aestivum L.) Yongliang Li, Aolong Sun, Qun Wu, Xiaoxiao Zou, Fenglin Chen, Ruqiong Cai, Hai Xie, Meng Zhang, Xinhong Guo
Supplementary Table 3: One-to-one orthologous relationships between T.aestivum and Rice
TaC2H2-ZF Gnee ID	OsC2H2-ZF Gene ID	Ka	Ks	Ka/Ks	EffectiveLen	AverageS-sites	AverageN-sites	Selection pressure	Mya
Traes_1AS_8F01029FE.1	Os05t0114400-01	0.189603	0.530087	0.357683	543	127.167	415.833	Purifying selection	40.7759
Traes_1AS_21ACC7F67.1	Os05t0106000-01	0.138273	0.627832	0.220239	1119	253.167	865.833	Purifying selection	48.2948
Traes_1BL_893115FCA.1	Os10t0555300-01	0.168071	0.428369	0.39235	996	250.5	745.5	Purifying selection	32.9515
Traes_1BS_0DEFAACB9.1	Os05t0106000-01	0.132036	0.670409	0.196948	1119	253.083	865.917	Purifying selection	51.5699
Traes_1BS_527ED00B9.1	Os05t0114400-01	0.173138	0.536047	0.322991	549	127.5	421.5	Purifying selection	41.2344
Traes_1DS_F40AC713C.1	Os05t0121400-02	0.192932	0.756929	0.254888	957	199.667	757.333	Purifying selection	58.2253
Traes_1DS_D1F453705.1	Os05t0114400-01	0.190229	0.571049	0.333121	549	128.417	420.583	Purifying selection	43.9268
Traes_2AL_7ABA7B7C8.1	Os04t0566400-02	0.0927494	0.462594	0.200499	1764	426.75	1337.25	Purifying selection	35.5841
Traes_2AS_FA70DB417.1	Os07t0598800-00	0.191108	0.443892	0.430529	1155	295.5	859.5	Purifying selection	34.1455
Traes_2BS_13A816248.1	Os07t0581366-00	0.151493	0.591343	0.256185	1869	465.667	1403.33	Purifying selection	45.4879
Traes_2AS_EC0A70BB3.1	Os07t0588600-01	0.174053	0.393241	0.442612	627	169.917	457.083	Purifying selection	30.2493
Traes_2DL_540050272.1	Os04t0566400-02	0.0990119	0.505917	0.195708	1773	430.75	1342.25	Purifying selection	38.9167
Traes_2BL_0A51FACEC1.1	Os04t0552700-01	0.13563	0.382646	0.354452	909	234.667	674.333	Purifying selection	29.4343
Traes_2BS_ACA52BC08.1	Os07t0598800-00	0.185543	0.442536	0.419271	1155	295.167	859.833	Purifying selection	34.0412
Traes_2BS_DD07C2EE6.1	Os07t0588600-01	0.170075	0.431675	0.393989	627	168.083	458.917	Purifying selection	33.2057
Traes_2BS_C270C0C9F.1	Os07t0581366-00	0.155056	0.592582	0.261661	1869	464.417	1404.58	Purifying selection	45.5832
Traes_2BL_58A855C7B.1	Os04t0566400-02	0.0959011	0.455965	0.210325	1773	430.75	1342.25	Purifying selection	35.0743
Traes_2AS_5A6E08D4E.1	Os07t0598800-00	0.183496	0.436154	0.420714	1161	297.833	863.167	Purifying selection	33.5503
Traes_2DS_AA0577470.1	Os07t0588600-01	0.176814	0.449569	0.393298	621	167.083	453.917	Purifying selection	34.5822
Traes_3AS_BE15533CD.1	Os01t0195000-01	0.180929	0.484126	0.373723	1425	336.417	1088.58	Purifying selection	37.2405
Traes_3AS_947FDA993.2	Os01t0129200-01	0.153139	0.403391	0.379629	747	187.5	559.5	Purifying selection	31.0301
Traes_3B_BD1C1A168.1	Os01t0242200-01	0.126639	0.465148	0.272255	1203	294.75	908.25	Purifying selection	35.7806
Traes_3AL_00FAACD5D.1	Os01t0871200-01	0.113135	0.698838	0.161889	1542	340.583	1201.42	Purifying selection	53.7568
Traes_3AL_35CA14632.1	Os01t0572300-01	0.148428	0.426846	0.347731	1395	325.667	1069.33	Purifying selection	32.8343
TRAES3BF127400030CFD_t1	Os01t0839100-01	0.195221	0.441617	0.442061	507	128.833	378.167	Purifying selection	33.9705
TRAES3BF099700020CFD_t1	Os01t0859100-01	0.166383	0.329834	0.504443	1089	250.75	838.25	Purifying selection	25.3719
Traes_3B_4F42DE6C4.1	Os01t0871200-01	0.109769	0.772385	0.142117	1548	341.833	1206.17	Purifying selection	59.4142
TRAES3BF182900010CFD_t1	Os01t0195000-01	0.170403	0.49843	0.34188	1434	337.333	1096.67	Purifying selection	38.3408
TRAES3BF064300010CFD_t1	Os01t0242200-01	0.117541	0.444774	0.264272	1200	293.083	906.917	Purifying selection	34.2134
TRAES3BF042100060CFD_t1	Os01t0572300-01	0.161594	0.414518	0.389835	1395	324.75	1070.25	Purifying selection	31.886
TRAES3BF044200110CFD_t1	Os01t0871200-01	0.111387	0.72674	0.153269	1548	342	1206	Purifying selection	55.9031
Traes_3AS_88AAED4BB.1	Os01t0195000-01	0.167077	0.455708	0.366632	1410	332.833	1077.17	Purifying selection	35.0545
Traes_3B_72EA1BDB5.2	Os01t0572300-01	0.149871	0.447947	0.334574	1395	325.167	1069.83	Purifying selection	34.4575
Traes_3B_850142A99.1	Os01t0935000-01	0.255132	0.459785	0.554893	1329	334.083	994.917	Purifying selection	35.3681
Traes_3DS_FB4C40DCE.1	Os01t0129200-01	0.158745	0.425558	0.373028	747	187.833	559.167	Purifying selection	32.7352
Traes_4AL_B808CA890.1	Os11t0702400-01	0.260113	0.467448	0.556455	453	120.5	332.5	Purifying selection	35.9575
Traes_4AS_501676A91.1	Os03t0197800-00	0.137077	0.564689	0.242748	1449	370.083	1078.92	Purifying selection	43.4376
Traes_4AL_FC7AEBB05.1	Os03t0838800-00	0.306627	0.482557	0.635422	1071	253.833	817.167	Purifying selection	37.1198
Traes_4AS_2718699A7.1	Os03t0237250-01	0.139331	0.385221	0.361692	1230	330.833	899.167	Purifying selection	29.6324
Traes_4BL_DB9678C4C.1	Os03t0237250-01	0.152115	0.408422	0.372446	1200	326	874	Purifying selection	31.4171
Traes_4BS_FE945D2FC.1	Os03t0610400-01	0.142163	0.395385	0.359555	633	163.25	469.75	Purifying selection	30.4142
Traes_4DS_676CACEAC.1	Os03t0610400-01	0.153006	0.38781	0.394539	615	157.417	457.583	Purifying selection	29.8315
Traes_5AL_81EFE5211.1	Os09t0431900-00	0.199067	0.381881	0.52128	348	89.6667	258.333	Purifying selection	29.3755
Traes_5BS_AA1369440.1	Os12t0583700-00	0.268298	0.451931	0.593671	693	181.667	511.333	Purifying selection	34.7639
Traes_1AS_CD57D000A.1	Os12t0578800-01	0.326639	0.566956	0.576128	1074	245.083	828.917	Purifying selection	43.612
Traes_5BL_7F56360BF.1	Os03t0764100-01	0.110505	0.352033	0.313905	771	195.167	575.833	Purifying selection	27.0795
Traes_5BL_BA26BA910.1	Os03t0838800-00	0.273721	0.447913	0.611102	1056	248.583	807.417	Purifying selection	34.4549
Traes_5BS_AA1369440.1	Os03t0610400-01	0.287419	0.468981	0.612858	663	170.167	492.833	Purifying selection	36.0755
Traes_5BL_3E6B0CD61.1	Os09t0431900-00	0.258576	0.443495	0.583042	366	94.3333	271.667	Purifying selection	34.115
Traes_5BL_096B0BDA8.1	Os09t0555700-02	0.175408	0.608157	0.288425	1542	387.417	1154.58	Purifying selection	46.7813
Traes_5DS_818C09355.1	Os12t0578800-01	0.334552	0.548323	0.610137	1074	244.667	829.333	Purifying selection	42.1787
Traes_5DL_6CBF61AA4.1	Os03t0764100-01	0.11894	0.345922	0.343836	774	196.667	577.333	Purifying selection	26.6093
Traes_5DL_4E890ABF3.1	Os03t0820300-01	0.274734	0.44042	0.623799	477	119.083	357.917	Purifying selection	33.8785
Traes_5DL_F269EF70D.1	Os03t0820300-01	0.358759	0.833251	0.430553	387	94.75	292.25	Purifying selection	64.0963
Traes_5DL_B97546DA11.1	Os09t0431900-00	0.194036	0.400671	0.484278	348	89.6667	258.333	Purifying selection	30.8209
Traes_5DL_13706ACAF.1	Os09t0555700-02	0.166323	0.573453	0.290038	1539	387.083	1151.92	Purifying selection	44.1117
Traes_6AL_779D5240A.1	Os02t0659500-01	0.136632	0.395598	0.345382	930	240.167	689.833	Purifying selection	30.4306
Traes_6AL_1A07854E2.1	Os02t0672100-01	0.106723	0.479136	0.22274	1722	415.167	1306.83	Purifying selection	36.8566
Traes_6AL_3DEF1B023.1	Os02t0823900-00	0.230295	0.456678	0.504284	1011	268	743	Purifying selection	35.1291
Traes_6AL_779D5240A.1	Os04t0552700-01	0.20202	0.528204	0.382466	894	231	663	Purifying selection	40.6311
Traes_6BL_D87B09F77.1	Os02t0659100-01	0.183445	1.03962	0.176453	1752	417.5	1334.5	Purifying selection	79.9708
Traes_4AL_954AE4933.1	Os02t0672100-01	0.100937	0.463546	0.217751	1716	413.583	1302.42	Purifying selection	35.6574
Traes_6DL_3B9E63F04.2	Os02t0572900-01	0.141452	0.597287	0.236823	1092	280.083	811.917	Purifying selection	45.9452
Traes_6DL_9FC9C02351.1	Os02t0659500-01	0.145758	0.400927	0.363553	936	241.5	694.5	Purifying selection	30.8406
Traes_6DL_434BF5425.1	Os02t0659100-01	0.176653	1.02875	0.171717	1605	378.75	1226.25	Purifying selection	79.1343
Traes_6DL_88DFCF552.1	Os02t0823900-00	0.202466	0.443293	0.456732	999	265.417	733.583	Purifying selection	34.0995
Traes_6DL_244C908B5.1	Os02t0672100-01	0.104145	0.459956	0.226423	1722	415.917	1306.08	Purifying selection	35.3812
Traes_6DL_9FC9C02351.1	Os04t0552700-01	0.206256	0.487456	0.423129	894	229	665	Purifying selection	37.4966

## Sheet: T.aestivum and Arabidopsis
Additional file 1 of Comprehensive genomic survey, structural classification and expression analysis of C2H2-type zinc finger factor in wheat (Triticum aestivum L.) Yongliang Li, Aolong Sun, Qun Wu, Xiaoxiao Zou, Fenglin Chen, Ruqiong Cai, Hai Xie, Meng Zhang, Xinhong Guo
Supplementary Table 3: One-to-one orthologous relationships between T.aestivum and Arabidopsis
TaC2H2-ZF Gene ID	AtC2H2-ZF Gene ID	Ka	Ks	Ka/Ks	EffectiveLen	AverageS-sites	AverageN-sites	Selection pressure	Mya
Traes_7AS_9671D35EF.1	AT3G57670	0.6385	0.906716	0.70419	1074	313.733	760.267	Purifying selection	69.7474
Traes_5AL_78701B16C.1	AT3G57670	0.3281	0.856526	0.383059	1077	327.938	749.062	Purifying selection	65.8866
Traes_4DL_AA51A43E7.1	AT2G29660	0.4562	0.961476	0.474479	1002	296.613	705.387	Purifying selection	73.9597
Traes_4BL_3B919C814.1	AT2G29660	0.5192	0.953996	0.544237	1005	296.858	708.142	Purifying selection	73.3843
Traes_4AS_D4763E468.1	AT2G37430	0.31757	0.721729	0.440013	477	141.917	335.083	Purifying selection	55.5176
Traes_7AS_8054DC45D.1	AT3G57670	0.604656	0.7263	0.832515	1510	356.71	1153.29	Purifying selection	55.8692
Traes_5DL_51643AC9F.1	AT3G57670	0.307219	0.58891	0.521674	1709	543.43	1165.57	Purifying selection	45.3008
Traes_5BL_6888AE9CB.1	AT3G57670	0.712465	0.91181	0.781374	1532	356.297	1175.7	Purifying selection	70.1392
TARES3BF127400030CFD_1	AT2G37430	0.775785	0.87213	0.889529	1778	459.31	1318.69	Purifying selection	67.0869
