# Supplementary material for: Comprehensive genomic survey, structural&nbsp;classification and expression analysis of C2H2-type&nbsp;zinc finger factor&nbsp;in wheat (Triticum aestivum&nbsp;L.)
Source: Research Square preprint supplement (doi:10.21203/rs.3.rs-215409/v1), 2021-02-11
Supplement: Supplementary file 3 [file 73140197fc9f4f8f6cbadbef.xlsx]

## Sheet: Sheet1
Additional file 1 of Comprehensive genomic survey, structural classification and expression analysis of C2H2-type zinc finger factor in wheat (Triticum aestivum L.) Yongliang Li, Aolong Sun, Qun Wu, Xiaoxiao Zou, Fenglin Chen, Ruqiong Cai, Hai Xie, Meng Zhang, Xinhong Guo
Supplementary Table S4: The list of primers
Gene Name	forward primer (5'-3')	reverse primer (5'-3')
Traes_1AL_319447519.1	CCCAAGAAGCAAGAGACTGG	CCCTCGCTGTTGAATGTCTT
Traes_1BL_3EEA722DF.1	TGATGAGGATGACAGCGAAG	CCCAGTCTCTTGCTTCTTGG
Traes_1DL_63D5C4C8E.2	GATTTTGATTCCGAGGACGA	CAATGCTCCATCATCACCAG
Traes_2AL_1FB739291.1	CTACAGGCTGGCTCTCAGGA	GCGTCTGCTTCTTGGACTTC
Traes_2BS_11131541B.1	GGAGCTGTGTCCGTGCTC	TGCCAGCTCGACTTGAAGAT
Traes_2DS_2CE71025C.1	AGTTCGCCTGAATCCAAATG	TGAGGCAGTGCTCTTTGCTA
Traes_4AL_B808CA890.1	GTGATCGGCAAGAACAAGC	ACACAGAGAGGCACGAGGTC
Traes_4BS_FE945D2FC.1	CAAGAAGACCTTCCCGACTG	TTAGCCTCGGCTTCTTGAAC
Traes_4DL_D73F1E523.1	CGTGTACTGTGACCGCAAGT	AGACACGAGACTGTGGCGTA
Traes_4DS_276818E4F.1	GGCCTCGATCTCCTGCTC	TGCTGAGCAGACACAGACAG
Traes_5AS_7E3208FD4.1	CGGAAGTGAAATCTGGTGGT	CTCTGTCGCAACCTTCATCA
Traes_5BL_096B0BDA8.1	GGCGAGAAGAAGTGGAAGTG	ATTACTGAGGGCCATGTTGC
Traes_5BL_388501B7C.1	AAGACCACGGACCAGAAGC	ACGAAGAGCTGGAGCAGAAC
Traes_5BL_3A9D3CEEF.1	GCGAGTTCGTGTGCAAGAC	CTTCTCCTCCTGACGCTTCC
Traes_5BL_5391EC4A0.1	GCGAGGGAGAAGGAGGTATT	ACGTCCTGCACACGAACTC
Traes_5BL_56E52A2FC.1	GGGGAGTTCATGTGCAAGAC	ACTGGTGCCCCTGCTTCT
Traes_5BL_630A8A142.1	GCTGTCTCTCAGCACGGACT	AAGTCTTGCAGACGAACTCTCC
Traes_5BL_6688D6ECE.1	CAGCAAATTCTCCAGCATCA	TCCATTTCGGCTCTGTTTTC
Traes_5BL_6F2D345E2.1	ATCAAGGAGAGGCAAAAGCA	ACGAACAGCTCGAGCAAGAC
Traes_5BL_7F56360BF.1	GGCAAGTCCTTCAGCTCCTA	GGAACTCCTTTTGGCAGATG
Traes_5BL_8DB8274DB1.1	AAGAAGACCACGGACCAGAA	ACGAAGAGCTGGAGCAGAAC
Traes_5BL_B038BE0A3.1	AAGAAGACGACGGACCAGAA	ACGAAGAGCTGGAGCAGAAC
Traes_5BL_D53A846BE.1	CGCAAAAGAGCATCAATCAA	CACTACTCTCCTCCGCCTTG
Traes_5BL_F74D668D9.1	AGGGAGGAAGAGCCAGTTGT	CAAGTCTTGCACACGAACTCC
Traes_5DL_13706ACAF.1	GGCGAGAAGAAGTGGAAGTG	CCAAAATCCAACAGCAAACA
Traes_5DL_4831C18DC.1	GTCATCAAGGAGCGGAAAAG	ACGAACAGCTGCAGCAAGAC
Traes_5DL_4E890ABF3.1	GACTGCCACATCTGCACACT	CGAACAACTCGAGCAAGACA
Traes_5DL_6CBF61AA4.1	CCATCTGCCAAAAGGAGTTC	GTCGTCCTCCCACATCATCT
Traes_5DL_81A2647C1.1	CCATCTGCCAAAAGGAGTTC	GTCGTCCTCCCACATCATCT
Traes_5DL_AA1443700.1	CGAGTTCGTCTGCAAGACAT	CTGCCCCATCTCGAACTCTA
Traes_5DL_B97546DA11.1	TCACCTGCACCTACTGCAAC	GTCCTTCCCTCTCCTGCTG
Traes_5DL_DAA202B82.1	TGCCCAATCCTATGATGACA	TGATGCTGGAGAATTTGCTG
Traes_6AL_1A07854E2.1	GTGGAAGCTGAAGCAGAAGG	CGCACTTCCACTTCTTCTCG
Traes_6AL_3DEF1B023.1	CGTCCACGACGAAGAAAGAG	TCAATAATGGCAATCCACCA
Traes_7AS_09344A629.1	ACCAGAACGCTCACAAGCTC	TGCAGCTTGGCCACTATCT
Actin-TaRP15-F	GCACACGTGCTTTGCAGATAAG	GCCCTCAAGCTCAACCATAACT
